# Supplementary material for: Ionic liquids and solids with paramagnetic anions
Source: Royal Society of Chemistry journal article supplement (doi:10.1039/b920652n), 2010-01-01
Supplement: b920652n.pdf [file b920652n.pdf]

# Supplementary Information

## Ionic Liquids and Solids with Paramagnetic Anions

February 6, 2010

**Brenna M. Krieger,<sup>1</sup> Heather Y. Lee,<sup>1</sup> Thomas J. Emge,<sup>1</sup> James F. Wishart,<sup>2</sup>  
and Edward W. Castner, Jr.<sup>1</sup>**

<sup>1</sup>Department of Chemistry and Chemical Biology  
Rutgers, The State University of New Jersey, Piscataway, NJ 08854-8087

<sup>2</sup>Chemistry Department, Brookhaven National Laboratory, Upton, NY 11973-5000

### **Experimental methods**

#### **Fourier-transform Infrared Spectroscopy.**

Ambient room temperature ( $294 \pm 1$  K) fourier-transform infrared (FT-IR) absorption spectra were recorded using a Thermo Nicolet/Nexus 670 FT-IR spectrometer.

## Results

### Fourier-transform Infrared Spectroscopy.

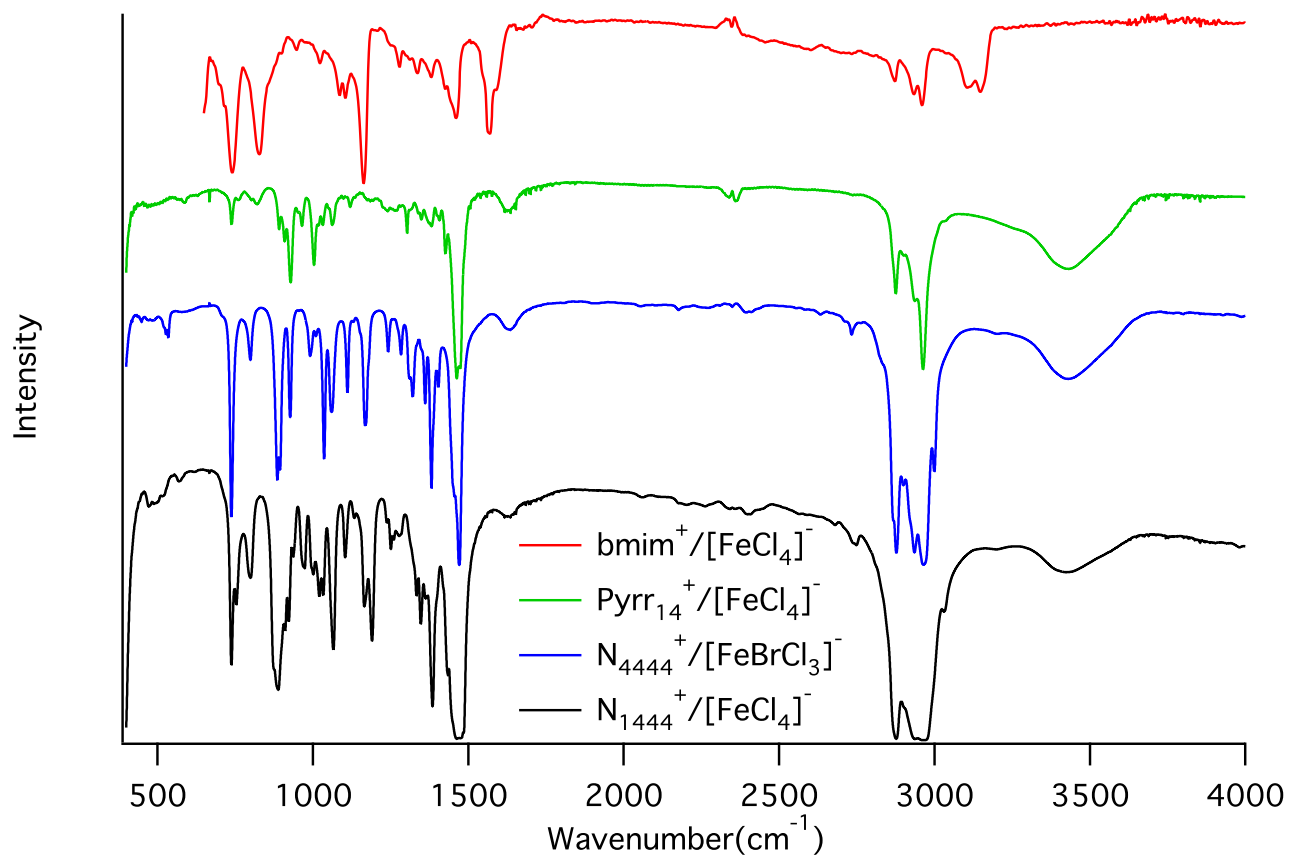

Figure 1: Infrared spectra of  $\text{bmim}^+/\text{[FeCl}_4\text{]}^-$ ,  $\text{Pyrr}_{14}^+/\text{[FeCl}_4\text{]}^-$ ,  $\text{N}_{4444}^+/\text{[FeBrCl}_3\text{]}^-$  and  $\text{N}_{1444}^+/\text{[FeCl}_4\text{]}^-$ .

## Raman spectroscopy

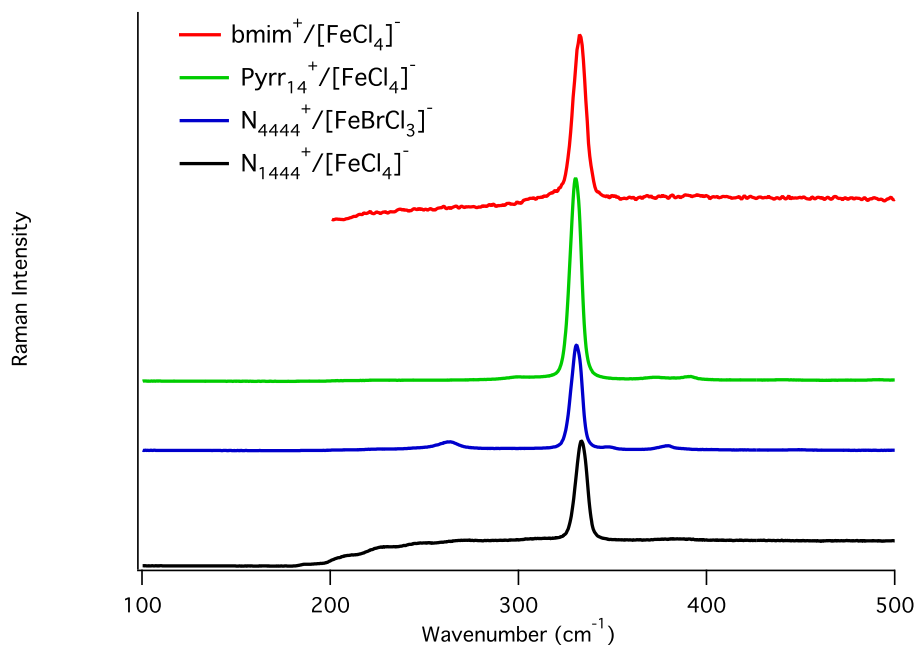

Figure 2: Raman spectra of  $\text{bmim}^+/\text{[FeCl}_4\text{]}^-$ ,  $\text{Pyrr}_{14}^+/\text{[FeCl}_4\text{]}^-$ ,  $\text{N}_{4444}^+/\text{[FeBrCl}_3\text{]}^-$  and  $\text{N}_{1444}^+/\text{[FeCl}_4\text{]}^-$ .

|                                                |       |
|------------------------------------------------|-------|
| $\text{bmim}^+/\text{[FeCl}_4\text{]}^-$       | 4.689 |
| $\text{Pyrr}_{14}^+/\text{[FeCl}_4\text{]}^-$  | 4.157 |
| $\text{N}_{4444}^+/\text{[FeBrCl}_3\text{]}^-$ | 3.976 |
| $\text{N}_{1444}^+/\text{[FeCl}_4\text{]}^-$   | 4.253 |

Table 1: FWHM for Raman lineshapes in  $\text{cm}^{-1}$ .

## Single crystal diffractometry

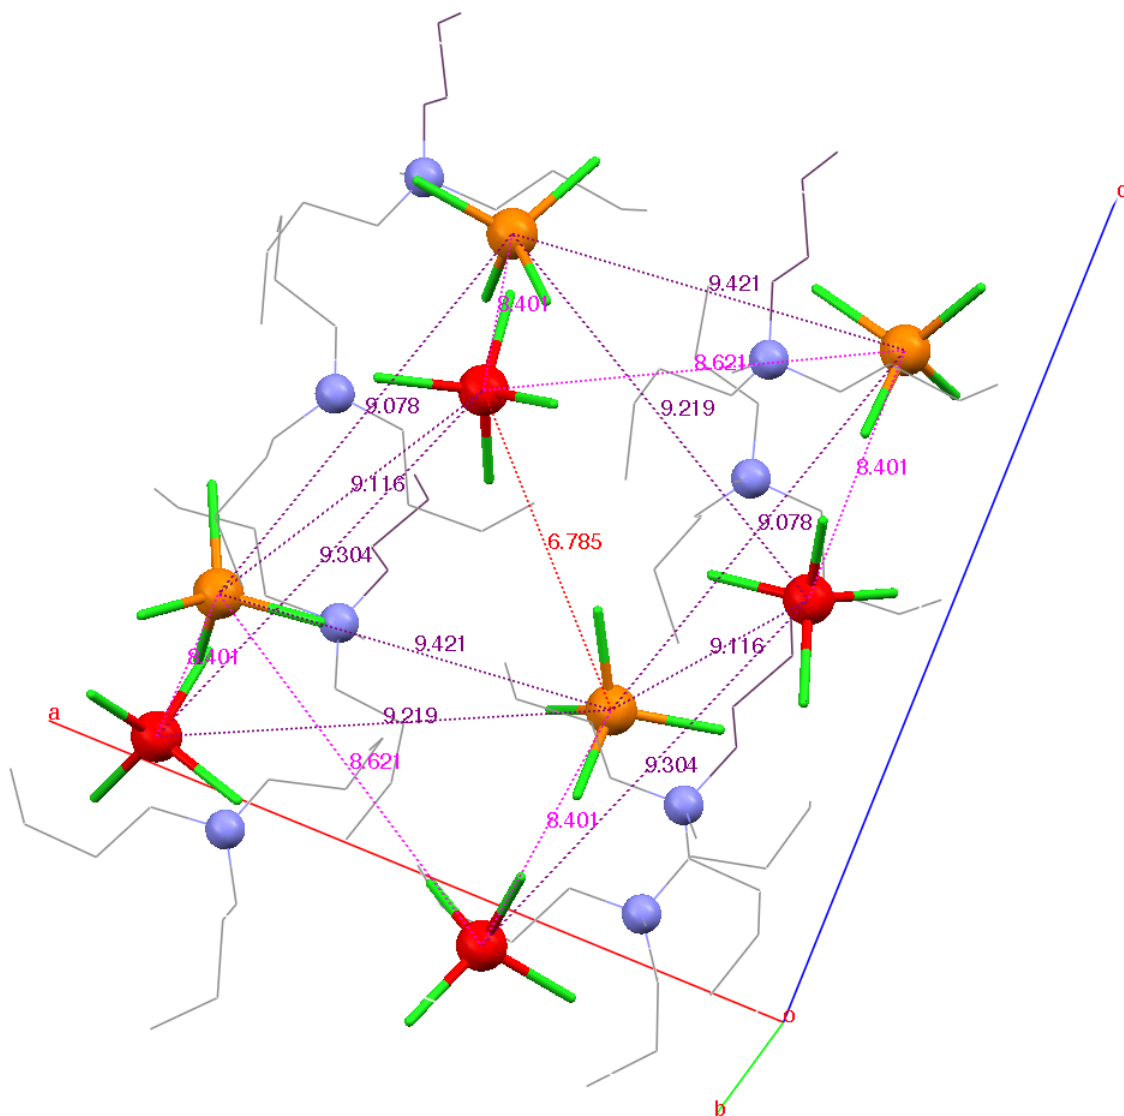

Figure 3: Diagram of the unit cell of  $N_{1444}^+/[FeCl_4]^-$  showing the distances between the iron atoms, depicted in red and orange to represent the two inequivalent positions. There is one relatively short separation of 6.785 Å per pair of inequivalent iron atoms. All other distances are greater than 8 Å.

## Thermal properties

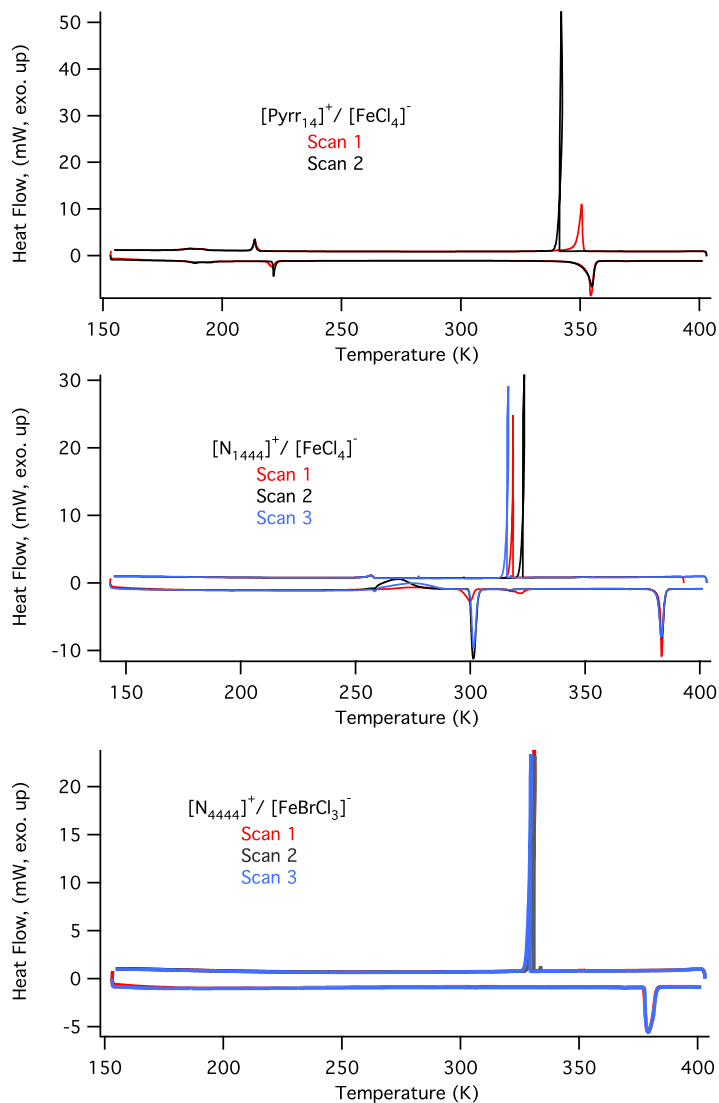

Figure 4: DSC scans of  $\text{Pyrr}_{14}^+ / [\text{FeCl}_4]^-$ ,  $\text{N}_{1444}^+ / [\text{FeCl}_4]^-$ , and  $\text{N}_{4444}^+ / [\text{FeBrCl}_3]^-$ . The data in this figure show the repetitive DSC scans measured at Brookhaven National Lab. Upon detailed examination of the data for  $\text{N}_{4444}^+ / [\text{FeBrCl}_3]^-$ , the lack of an appreciable heat capacity increase after the transition at 379 K suggested that it was not a melting transition. Consequently, a DSC scan extending to higher temperature was measured at Rutgers and it is shown in Fig. 4 of the paper.

## SQUID magnetic measurements

Magnetic susceptibility measurements were made on  $N_{4444}^+/[FeBrCl_3]^-$ ,  $N_{1444}^+/[FeCl_4]^-$  and  $Pyrr_{14}^+/[FeCl_4]^-$ . All three compounds display simple paramagnetic behavior in response to an applied field in these temperature ranges.

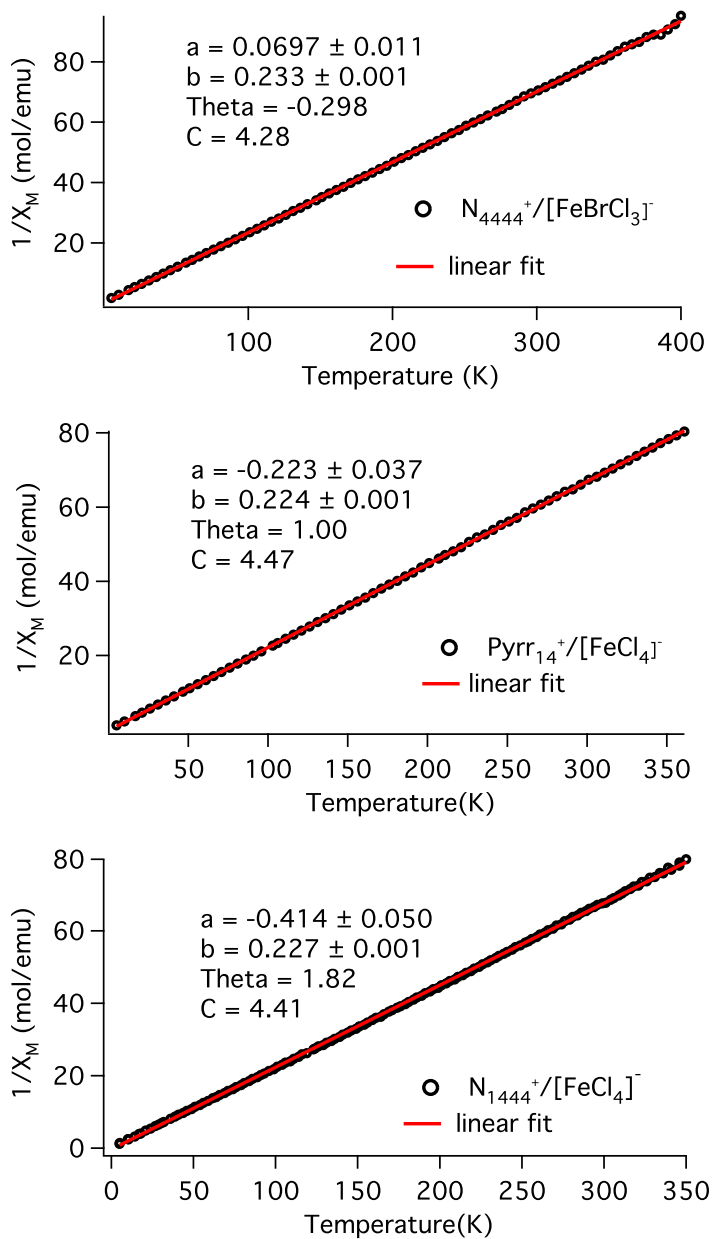

Figure 5: Inverse  $\chi_M$  of  $Pyrr_{14}^+/[FeCl_4]^-$ ,  $N_{1444}^+/[FeCl_4]^-$  and  $N_{4444}^+/[FeBrCl_3]^-$ .

## Crystallographic Information Files and checkCIF Files

The Crystallographic Information File (.cif file) for  $\text{Pyr}_{14}^+[\text{FeCl}_4]^-$  is named **p14b.cif**; the associated checkCIF file is **P14\_checkcif\_report.pdf**.

The Crystallographic Information File (.cif file) for  $\text{N}_{1444}^+[\text{FeCl}_4]^-$  is named **N1444b.cif**; the associated checkCIF file is **N1444\_checkcif\_report.pdf**.

These four files are available from the RSC ReSource site at <http://rsc.org>.
